# Supplementary material
Source: Springer Nature journal article supplement (https://www.springermedizin.de/resource/supplementary/12879_2013_2660_MOESM1_ESM.pdf/9445086)
Supplement: MOESM1 [file 9445086]

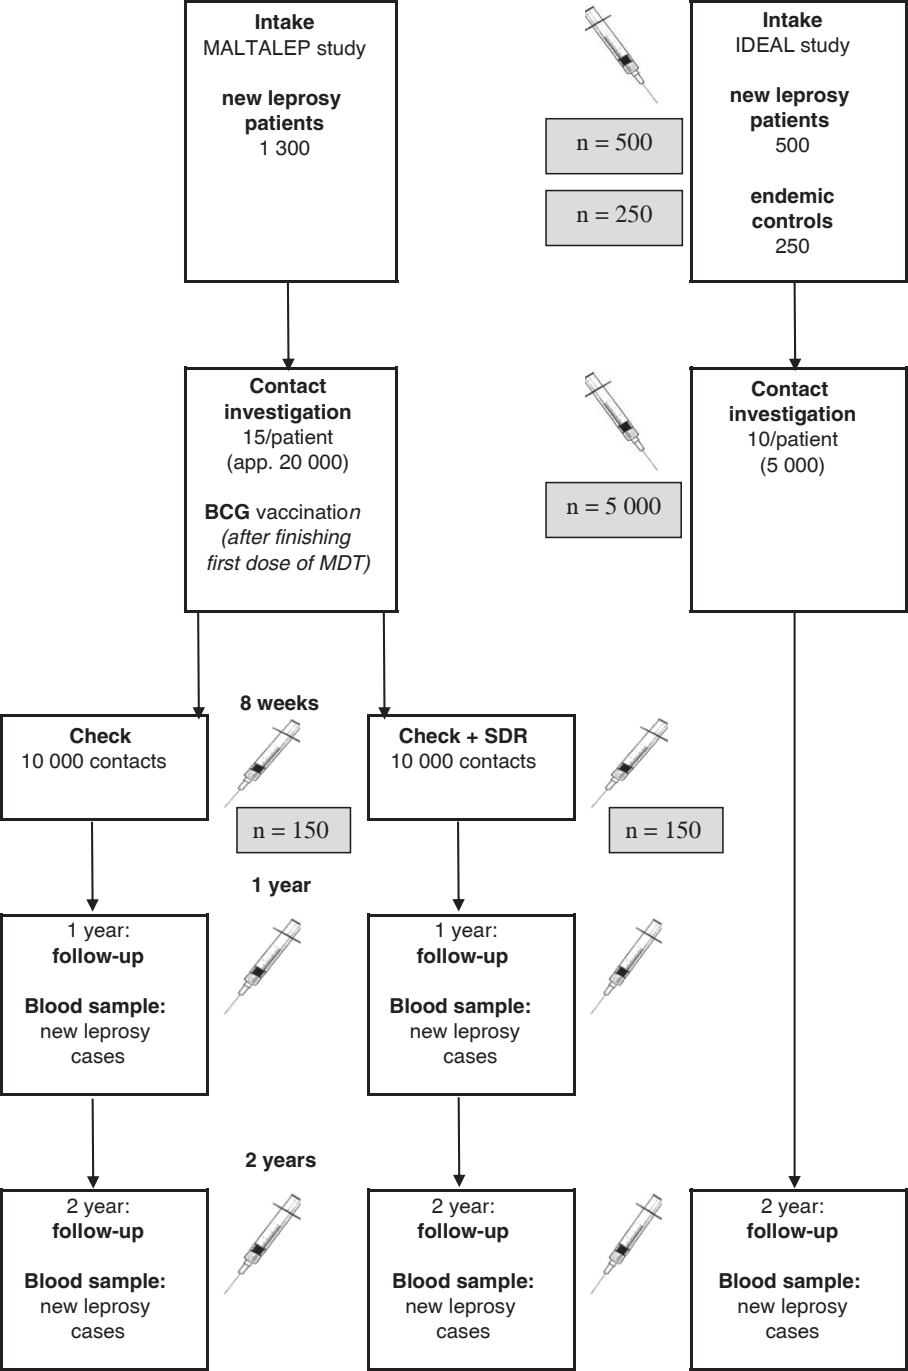

**Intake**  
MALTALÉP study

**new leprosy patients**  
1 300

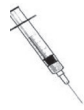

n = 500

n = 250

**Intake**  
IDEAL study

**new leprosy patients**  
500

**endemic controls**  
250

**Contact investigation**  
15/patient  
(app. 20 000)

**BCG vaccination**  
(after finishing first dose of MDT)

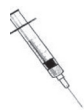

n = 5 000

**Contact investigation**  
10/patient  
(5 000)

**Check**  
10 000 contacts

8 weeks

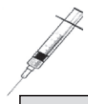

n = 150

**Check + SDR**  
10 000 contacts

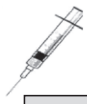

n = 150

1 year:  
**follow-up**

**Blood sample:**  
new leprosy cases

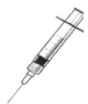

1 year:  
**follow-up**

**Blood sample:**  
new leprosy cases

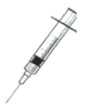

2 year:  
**follow-up**

**Blood sample:**  
new leprosy cases

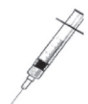

2 year:  
**follow-up**

**Blood sample:**  
new leprosy cases

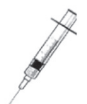

2 year:  
**follow-up**

**Blood sample:**  
new leprosy cases
